# Supplementary material for: Rapid Evolution of HERC6 and Duplication of a Chimeric HERC5/6 Gene in Rodents and Bats Suggest an Overlooked Role of HERCs in Mammalian Immunity
Source: PubMed Central journal article supplement (PMC7775381; doi:10.3389/fimmu.2020.605270), 2020-12-18

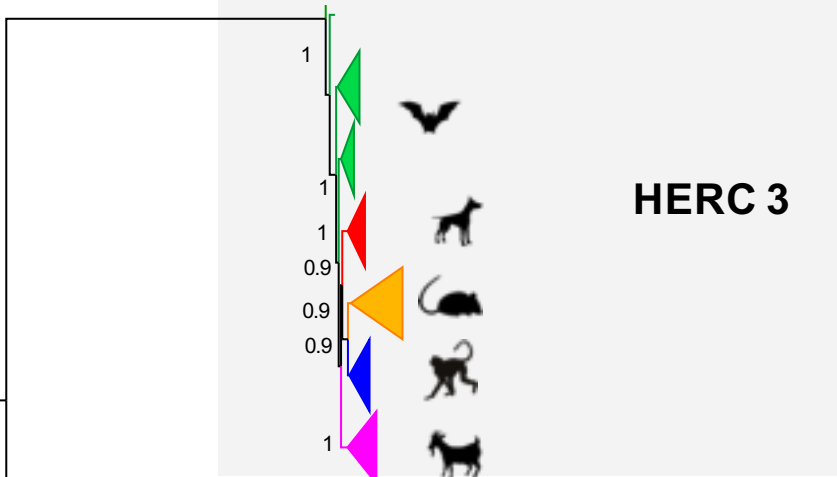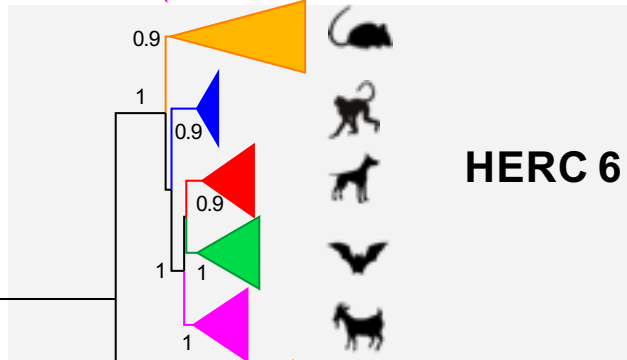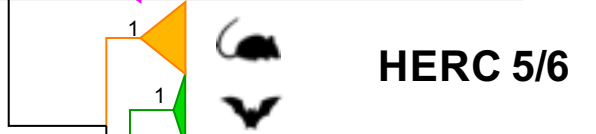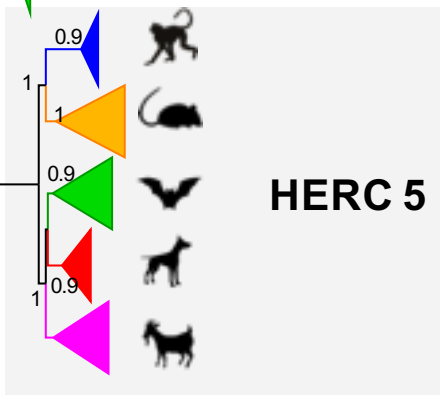

Supplement: Image_1.pdf [file Image_1.pdf]
