# Supplementary material for: Rapid Evolution of HERC6 and Duplication of a Chimeric HERC5/6 Gene in Rodents and Bats Suggest an Overlooked Role of HERCs in Mammalian Immunity
Source: PubMed Central journal article supplement (PMC7775381; doi:10.3389/fimmu.2020.605270), 2020-12-18

A)

XM\_012531677.2\_Orcinus\_orca  
 XM\_028166987.1\_Balaenoptera\_acutorostrata  
 XM\_027116949.1\_Lagenorhynchus\_obliquidens  
 XM\_033856429.1\_Tursiops\_truncatus  
 XM\_007472400.1\_Lipotes\_vexillifer  
 XM\_030761130.1\_Delphinapterus\_leucas

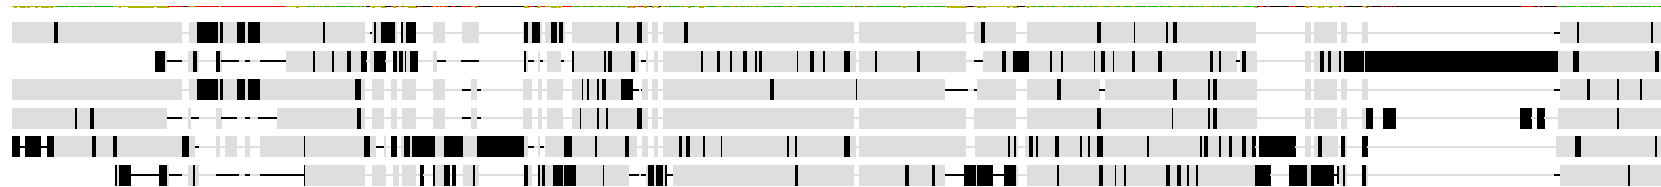

B)

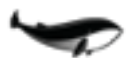

| Species                                   | ACTGCAAGTTTTTAAAGAAAAGAATCTGGAGAA |
|-------------------------------------------|-----------------------------------|
| XM_028166987.1_Balaenoptera_acutorostrata | T A S F * R K E S G E             |
| XM_030761130.1_Delphinapterus_leucas      | T E S F * R K E S G E             |
| XM_012531677.2_Orcinus_orca               | T A S F * R K E S G E             |
| XM_007472400.1_Lipotes_vexillifer         | T A S F * R K E S A E             |
| XM_033856429.1_Tursiops_truncatus         | T A S F * R K E S G E             |
| XM_027116949.1_Lagenorhynchus_obliquidens | T A S F * R K E S G E             |
| NM_025992.2_Mus_musculus_HERC6            | T A S F L K K R D A G             |
| Pipistrellus_kuhlii_HERC6                 | T A S F L K K R E S G             |
| XM_027970882.1_Ovis_aries_HERC6           | T A S F L K K R E P G             |
| AF336798.1_Homo_sapiens_HERC6             | T A S F L K K R G T G             |
| XM_023252945.1_Felis_catus_HERC6          | T A S F L K K R Q S V             |

Stop codon

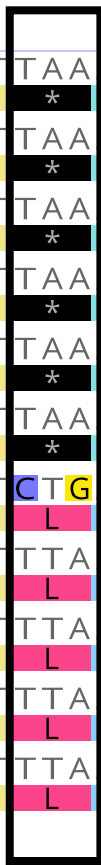

Supplement: Image_2.pdf [file Image_2.pdf]
