# Supplementary material for: Rapid Evolution of HERC6 and Duplication of a Chimeric HERC5/6 Gene in Rodents and Bats Suggest an Overlooked Role of HERCs in Mammalian Immunity
Source: PubMed Central journal article supplement (PMC7775381; doi:10.3389/fimmu.2020.605270), 2020-12-18
Supplement: Image_3.pdf [file Image_3.pdf]

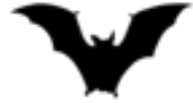

**HERC3**

- Eptesicus fuscus
- Myotis davidii
- Myotis myotis
- Myotis lucifigus
- Myotis brandtii
- Molossus molossus
- Miniopterus natalensis
- Desmodus rotundus
- Phyllostomus discolor
- Rousettus aegyptiacus
- Pteropus vampyrus
- Pteropus alecto
- Rhinolophus ferrumequinum
- Pipistrellus kuhlii

**HERC5**

- Hipposideros armiger
- Rhinolophus ferrumequinum
- Rousettus aegyptiacus
- Pteropus vampyrus
- Desmodus rotundus
- Phyllostomus discolor
- Miniopterus natalensis
- Pipistrellus kuhlii
- Myotis lucifigus
- Myotis brandtii

**Myotis brandtii** HERC5-6  
**Myotis lucifigus** HERC5-6

**HERC6**

- Myotis myotis
- Myotis brandtii
- Myotis lucifigus
- Pipistrellus kuhlii
- Eptesicus fuscus
- Molossus molossus
- Phyllostomus discolor
- Rhinolophus ferrumequinum
- Pteropus vampyrus
- Rousettus aegyptiacus

0.2

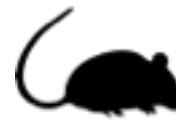

**HERC3**

- Cricetulus griseus
- Meriones unguiculatus
- Rattus rattus
- Arvicantis\_niloticus
- Grammomys\_surdaster
- Mastomys\_coucha
- Mus musculus
- Mus caroli
- Nannospalax galili
- Jaculus jaculus
- Castor canadensis
- Dipodomys\_ordii
- Octodon degus
- Cavia porcellus
- Chinchilla lanigera
- Heterocephalus glaber
- Fukomys damarensis
- Marmota flaviventris
- Ictidomys tridecemlineatus
- Urocitellus parryii

**HERC5**

- Marmota marmota
- Marmota flaviventris
- Ictidomys tridecemlineatus
- Urocitellus parryii
- Jaculus jaculus
- Nannospalax galili
- Dipodomys\_ordii
- Castor canadensis
- Heterocephalus glaber
- Octodon degus
- Chinchilla lanigera

**Cavia porcellus** HERC5-6  
**Octodon degus** HERC5-6  
**Chinchilla lanigera** HERC5-6  
**Fukomys damarensis** HERC5-6  
**Heterocephalus glaber** HERC5-6

**HERC6**

- Octodon degus
- Chinchilla lanigera
- Dipodomys\_ordii
- Castor canadensis
- Urocitellus parryii
- Marmota flaviventris
- Marmota marmota
- Nannospalax galili
- Cricetulus griseus
- Mesocricetus auratus
- Microtus ochrogaster
- Peromyscus leucopus
- Rattus norvegicus
- Rattus rattus
- Grammomys\_surdaster
- Mastomys\_coucha
- Mus pahari
- Mus caroli
- Mus musculus

0.2
