# Supplementary material for: Rapid Evolution of HERC6 and Duplication of a Chimeric HERC5/6 Gene in Rodents and Bats Suggest an Overlooked Role of HERCs in Mammalian Immunity
Source: PubMed Central journal article supplement (PMC7775381; doi:10.3389/fimmu.2020.605270), 2020-12-18

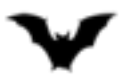

Myotis brandtii HERC5  
 Myotis brandtii HERC5/6like  
 Myotis brandtii HERC6

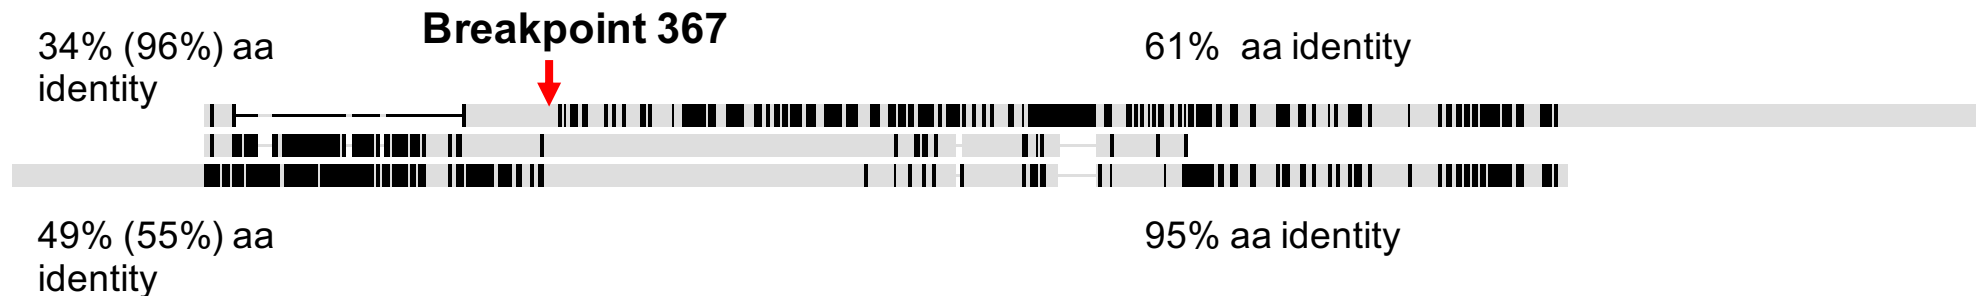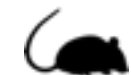

Octodon degus HERC5  
 Octodon degus HERC5/6like  
 Octodon degus HERC6

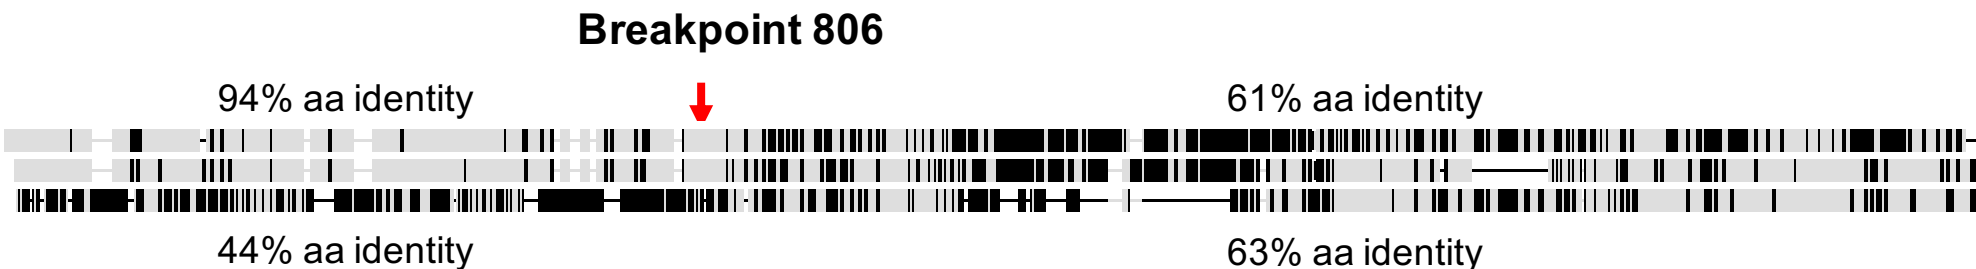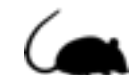

Heterocephalus glaber HERC5  
 Heterocephalus glaber HERC5/6like

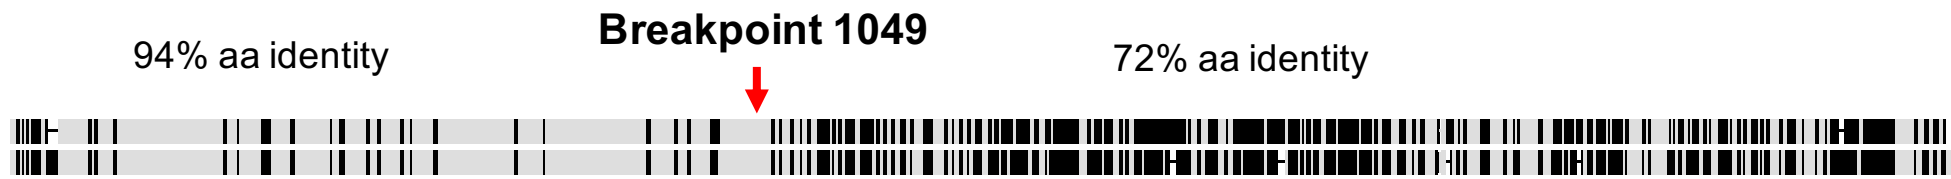

Supplement: Image_4.pdf [file Image_4.pdf]
